# Supplementary material
Source: Springer Nature journal article supplement (https://www.springermedizin.de/resource/supplementary/12958_2003_33_MOESM1_ESM.pdf/9566226)

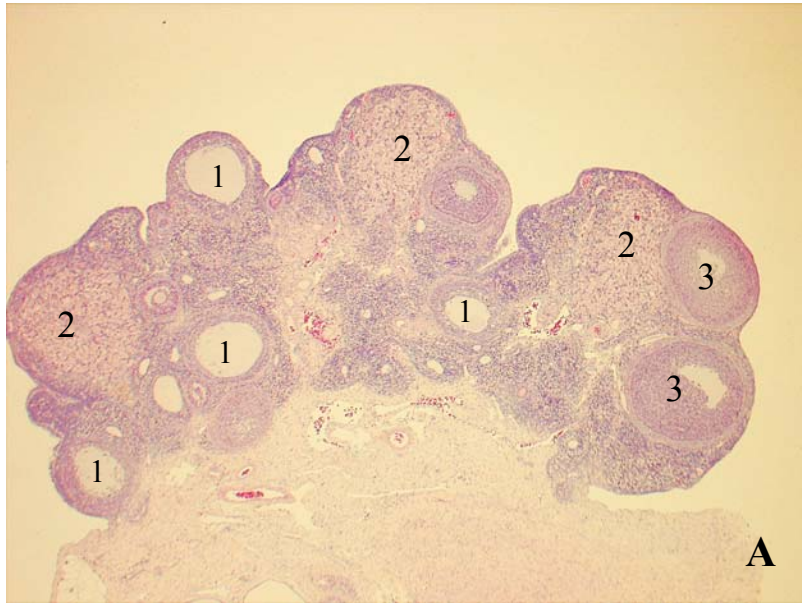

x4

A

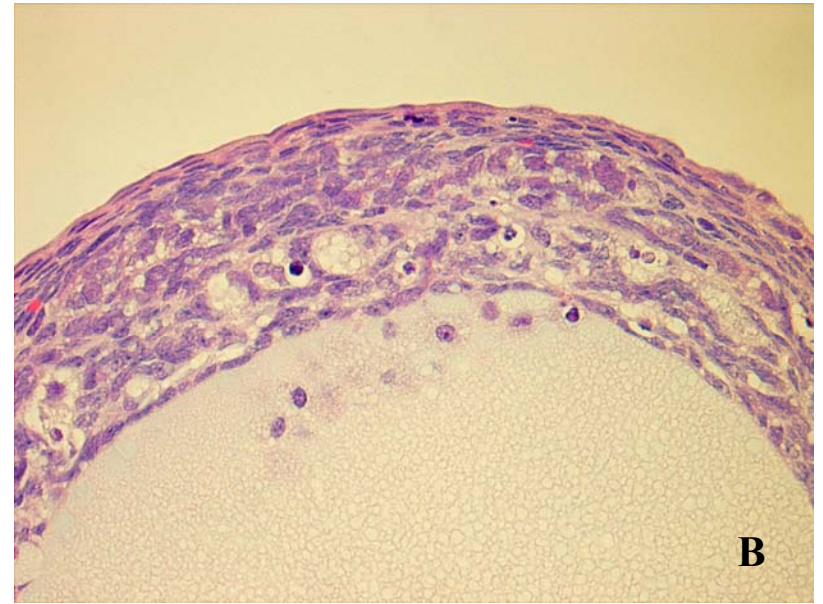

x60

B

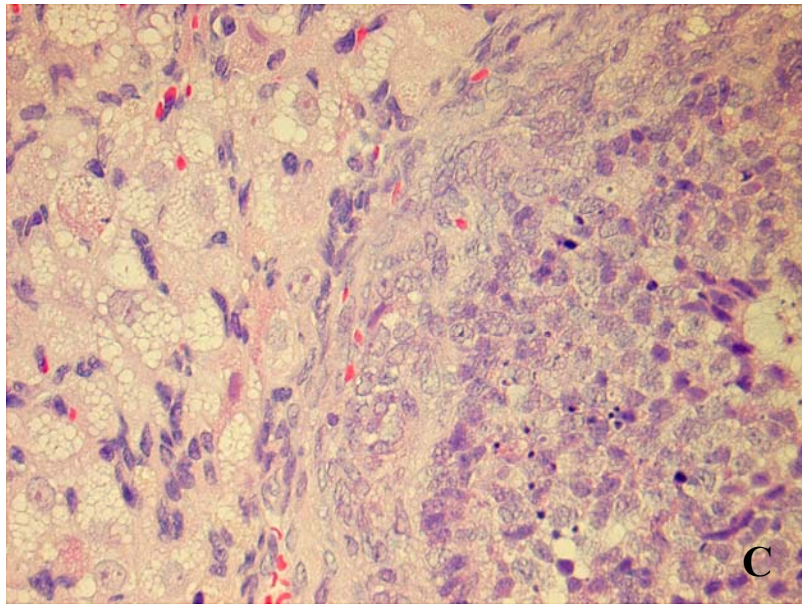

x60

C

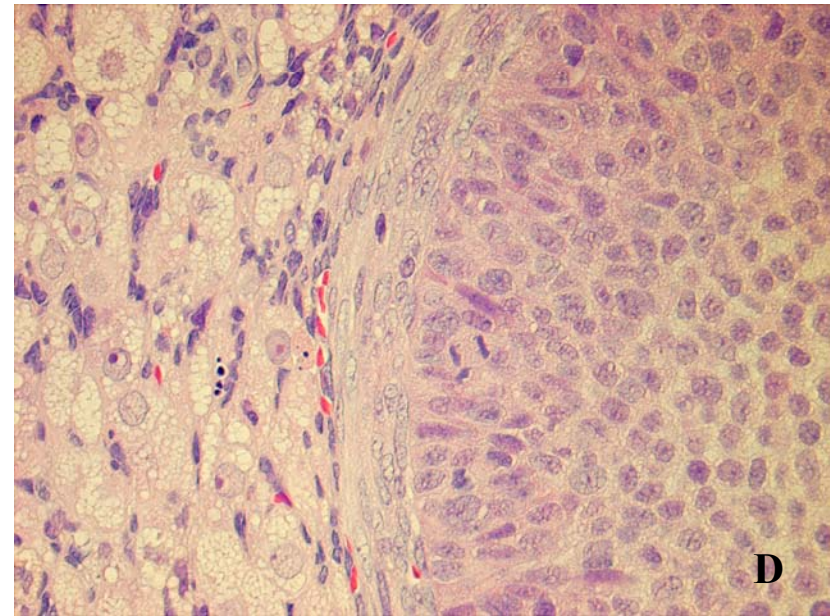

x60

D

PCO control

Supplement: MOESM1 [file 9566226]
